# Supplementary material for: Influence of Alkali Metal Substitution on the Phase Transition Behavior of CsGaQ2 (<em>Q</em> = S, Se)
Source: Preprints.org preprint supplement (doi:10.20944/preprints201710.0140.v1), 2017-10-20
Supplement: Supplementary file 1 [file supplementary]

Supplementary Information for the manuscript

# **Influence of Alkali Metal Substitution on the Phase- Transition Behavior of CsGaQ<sub>2</sub> (Q = S, Se)**

*Daniel Friedrich, Marc Schlosser, Martin Etter, and Arno Pfitzner\**

\*Prof. Dr. Arno Pfitzner

Institut für Anorganische Chemie, Universität Regensburg, Universitätsstraße 31, 93040

Regensburg, Germany

## **List of contents**

**Figure S1** X-ray diffraction patterns of the solid solution series  $\text{Cs}_{1-x}\text{K}_x\text{GaS}_2\text{-}m\text{C64}$ .

**Figure S2** X-ray diffraction patterns of the solid solution series  $\text{Cs}_{1-x}\text{Rb}_x\text{GaS}_2\text{-}m\text{C64}$ .

**Figure S3** X-ray diffraction patterns of the solid solution series  $\text{Cs}_{1-x}\text{K}_x\text{GaSe}_2\text{-}m\text{C64}$ .

**Figure S4** X-ray diffraction patterns of the solid solution series  $\text{Cs}_{1-x}\text{Rb}_x\text{GaSe}_2\text{-}m\text{C64}$ .

**Figure S5** Evolution of the X-ray powder diffraction patterns of all solid solutions in the temperature range from 20 – 900 °C

The crystal structures of the high-temperature solid-solutions were refined by Rietveld refinement using X-ray diffraction data collected at a synchrotron. Details on these refinements can be found in the main paper.

**Figure S6** Rietveld refinement of the X-ray diffraction pattern of  $\text{Cs}_{0.90}\text{K}_{0.10}\text{GaS}_2\text{-}m\text{C16}$ .

**Table S1** Atomic coordinates and isotropic displacement parameters for  $\text{Cs}_{0.90}\text{K}_{0.10}\text{GaS}_2\text{-}m\text{C16}$ .

**Table S2** Anisotropic displacement parameters for  $\text{Cs}_{0.90}\text{K}_{0.10}\text{GaS}_2\text{-}m\text{C16}$ .

**Figure S7** Rietveld refinement of the X-ray diffraction pattern of  $\text{Cs}_{0.84}\text{Rb}_{0.16}\text{GaS}_2\text{-}m\text{C16}$ .

**Table S3** Atomic coordinates and isotropic displacement parameters for  $\text{Cs}_{0.84}\text{Rb}_{0.16}\text{GaS}_2\text{-}m\text{C16}$ .

**Table S4** Anisotropic displacement parameters for  $\text{Cs}_{0.84}\text{Rb}_{0.16}\text{GaS}_2\text{-}m\text{C16}$ .

**Figure S8** Rietveld refinement of the X-ray diffraction pattern of  $\text{Cs}_{0.74}\text{Rb}_{0.26}\text{GaS}_2\text{-}m\text{C16}$ .

**Table S5** Atomic coordinates and isotropic displacement parameters for  $\text{Cs}_{0.74}\text{Rb}_{0.26}\text{GaS}_2\text{-}m\text{C16}$ .

**Table S6** Anisotropic displacement parameters for  $\text{Cs}_{0.74}\text{Rb}_{0.26}\text{GaS}_2\text{-}m\text{C16}$ .

**Figure S9** Rietveld refinement of the X-ray diffraction pattern of  $\text{Cs}_{0.90}\text{Rb}_{0.09}\text{GaSe}_2\text{-}m\text{C16}$ .

**Table S7** Atomic coordinates and isotropic displacement parameters for  $\text{Cs}_{0.91}\text{Rb}_{0.09}\text{GaSe}_2\text{-}m\text{C16}$ .

**Table S8** Anisotropic displacement parameters for  $\text{Cs}_{0.91}\text{Rb}_{0.09}\text{GaSe}_2\text{-}m\text{C16}$ .

**Figure S10** Rietveld refinement of the X-ray diffraction pattern of  $\text{Cs}_{0.79}\text{Rb}_{0.21}\text{GaSe}_2\text{-}m\text{C16}$ .

**Table S9** Atomic coordinates and isotropic displacement parameters for  $\text{Cs}_{0.79}\text{Rb}_{0.21}\text{GaSe}_2\text{-}m\text{C16}$ .

**Table S10** Anisotropic displacement parameters for  $\text{Cs}_{0.79}\text{Rb}_{0.21}\text{GaSe}_2\text{-}m\text{C16}$ .

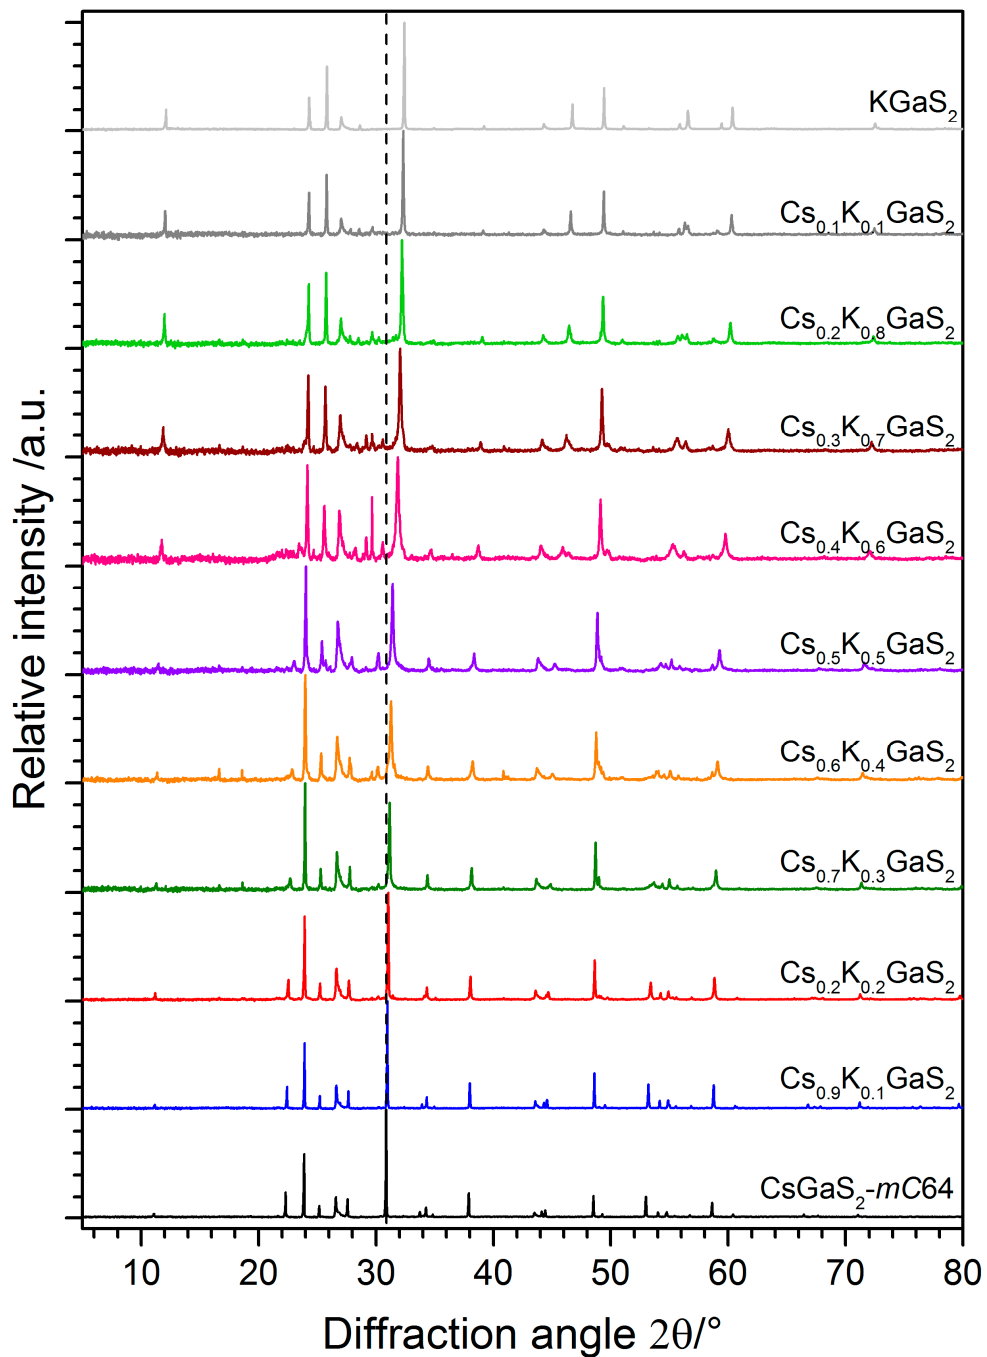

**Figure S1** X-ray diffraction patterns (Cu- $K\alpha_1$  radiation,  $\lambda = 1.540598 \text{ \AA}$ ) of each member of the solid solution series  $\text{Cs}_{1-x}\text{K}_x\text{GaS}_2$ -mC64 ( $x = 0 - 1$ ). The position of the strongest reflection of  $\text{CsGaS}_2$ -mC64 is highlighted by a dashed line to visualize the  $2\theta$  shift.

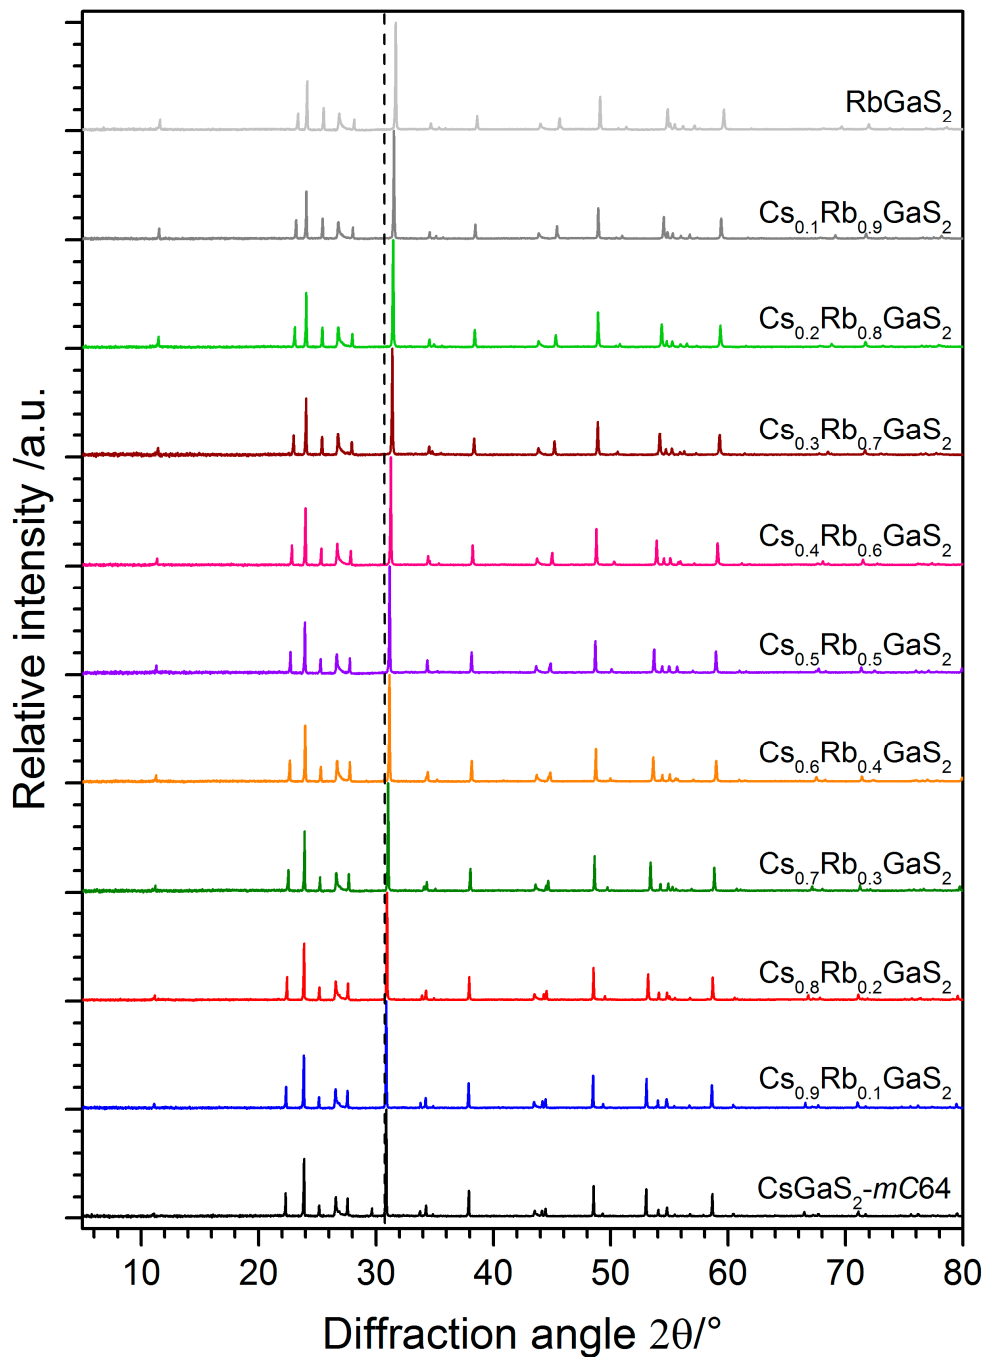

**Figure S2** X-ray diffraction patterns (Cu- $K\alpha_1$  radiation,  $\lambda = 1.540598 \text{ \AA}$ ) of each member of the solid solution series  $\text{Cs}_{1-x}\text{Rb}_x\text{GaS}_2\text{-}m\text{C64}$  ( $x = 0 - 1$ ). The position of the strongest reflection of  $\text{CsGaS}_2\text{-}m\text{C64}$  is highlighted by a dashed line to visualize the  $2\theta$  shift.

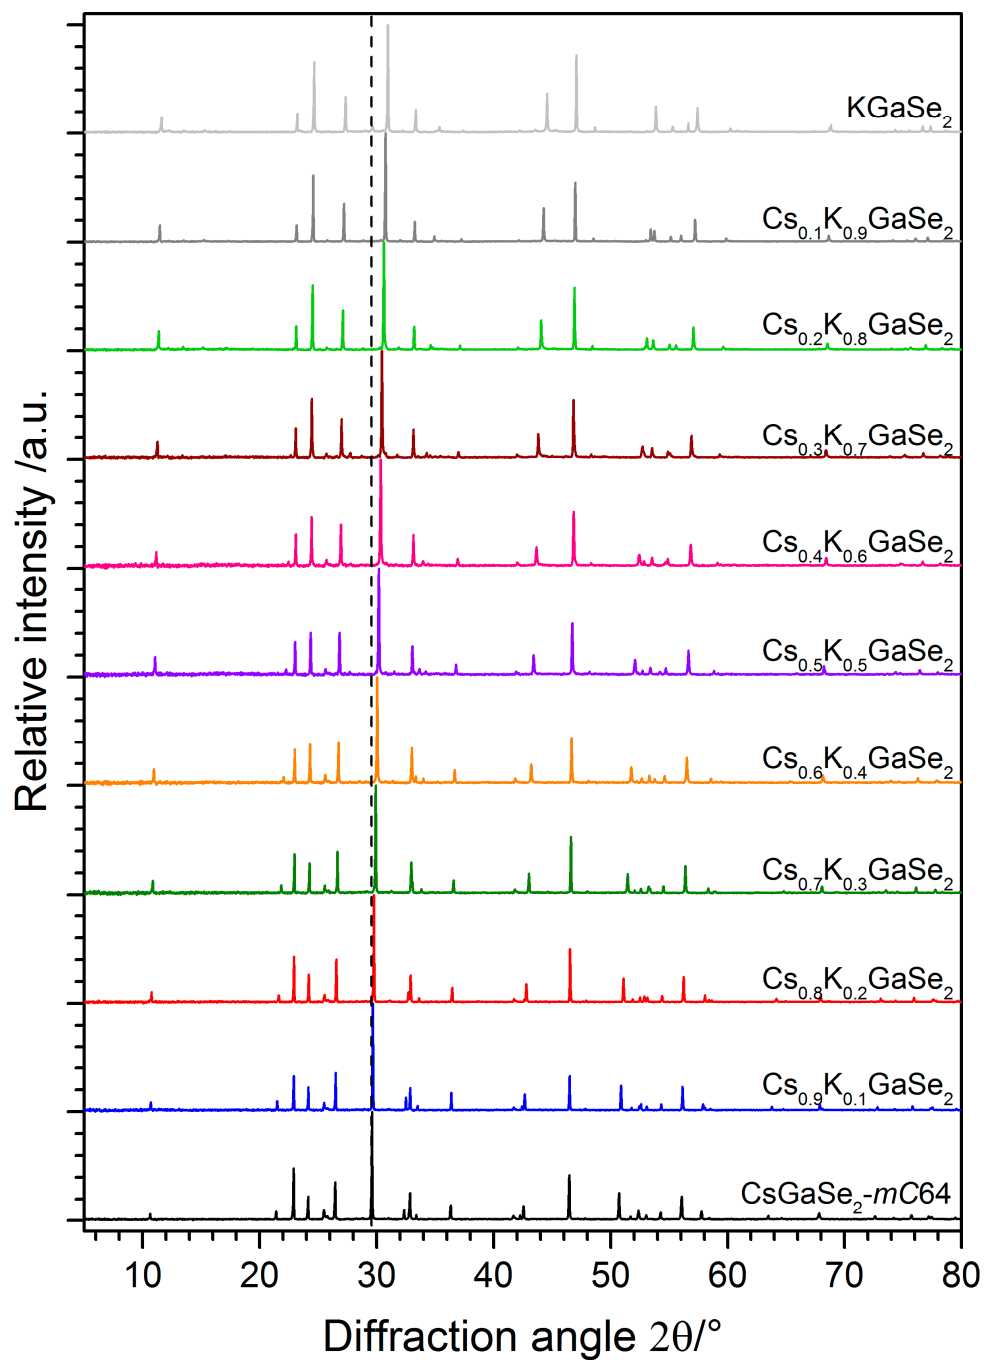

**Figure S3** X-ray diffraction patterns (Cu- $K\alpha_1$  radiation,  $\lambda = 1.540598 \text{ \AA}$ ) of each member of the solid solution series  $\text{Cs}_{1-x}\text{K}_x\text{GaSe}_2$ -*m*C64 ( $x = 0 - 1$ ). The position of the strongest reflection of  $\text{CsGaSe}_2$ -*m*C64 is highlighted by a dashed line to visualize the  $2\theta$  shift.

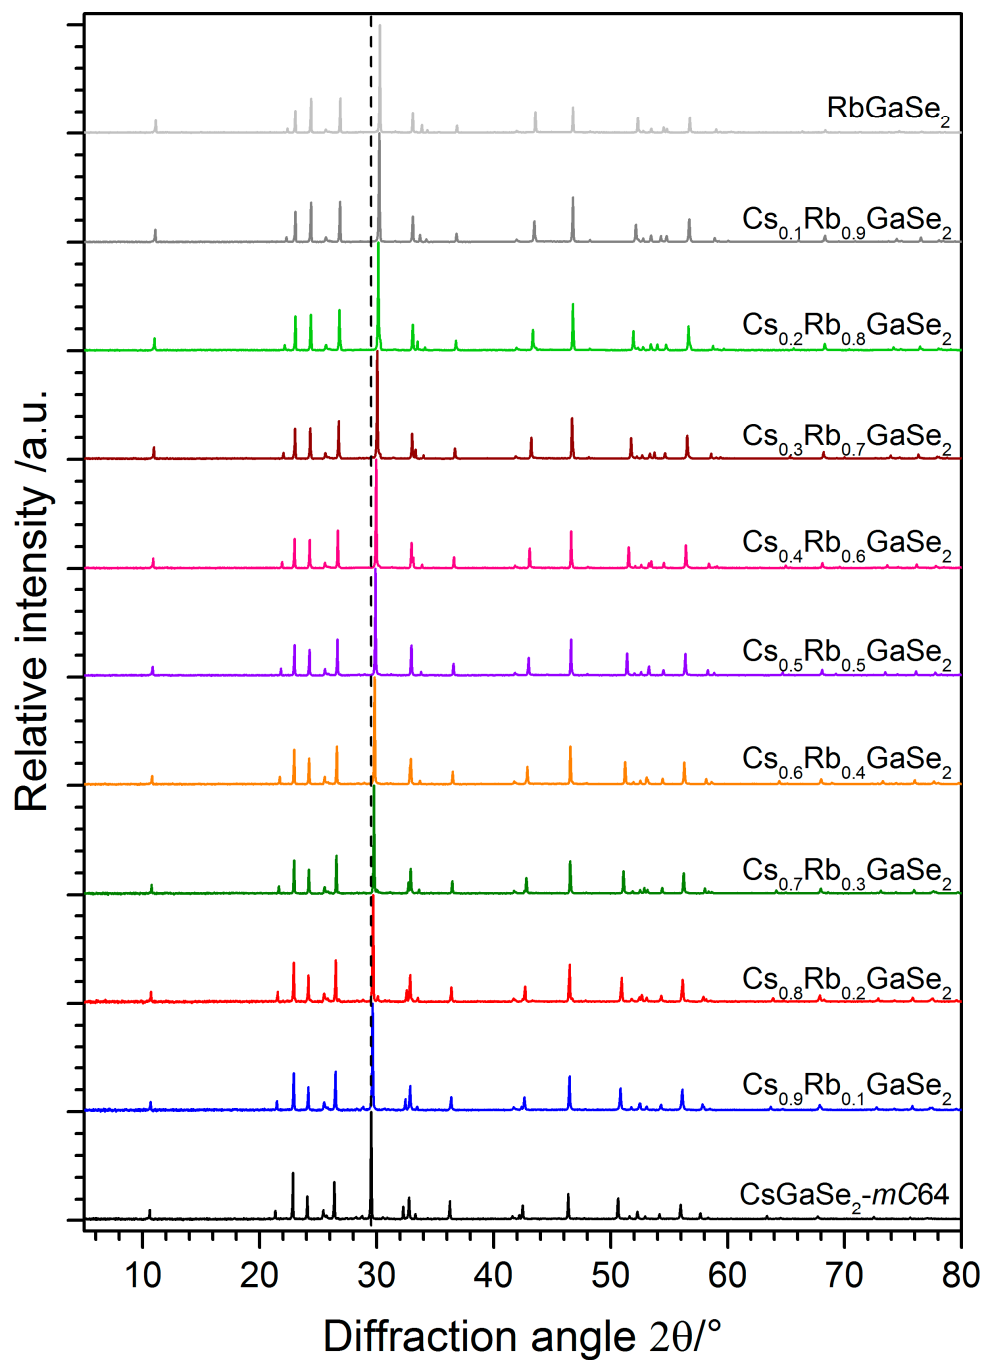

**Figure S4** X-ray diffraction patterns (Cu- $K\alpha_1$  radiation,  $\lambda = 1.540598 \text{ \AA}$ ) of each member of the solid solution series  $\text{Cs}_{1-x}\text{Rb}_x\text{GaSe}_2$ -mC64 ( $x = 0 - 1$ ). The position of the strongest reflection of  $\text{CsGaSe}_2$ -mC64 is highlighted by a dashed line to visualize the  $2\theta$  shift.

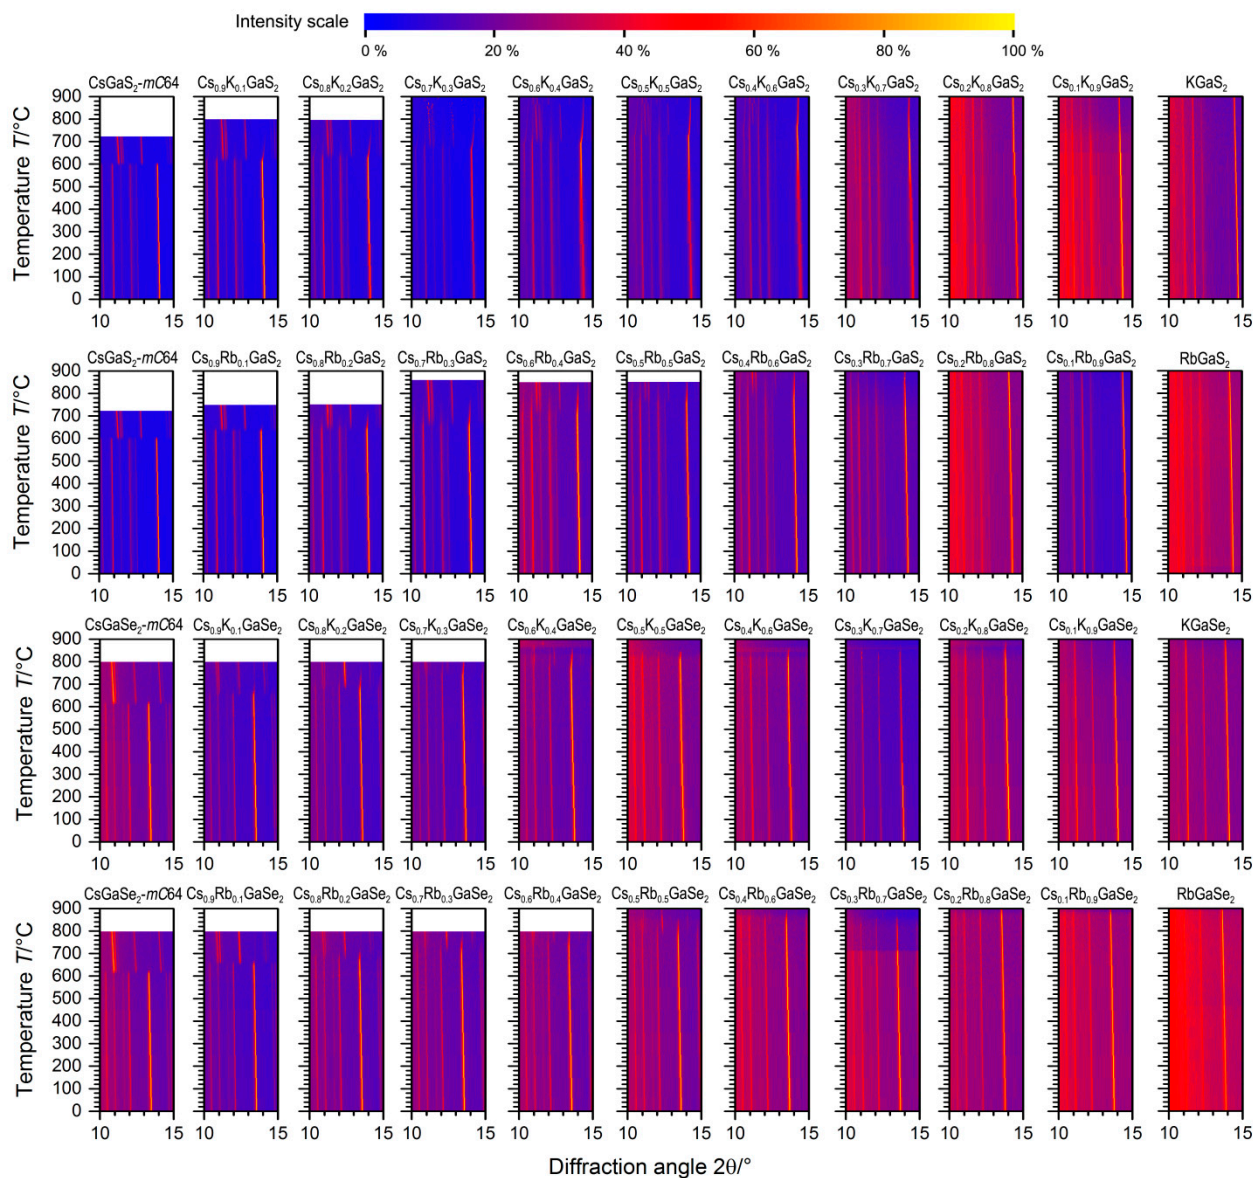

**Figure S5** Evolution of the X-ray powder diffraction patterns of all solid solutions  $\text{Cs}_{1-x}\text{M}_x\text{GaS}_2\text{-}m\text{C64}$  ( $M = \text{K, Rb}$ ;  $x = 0 - 1$ ) in the temperature range from 20 – 900 °C (Mo- $K\alpha_1$  radiation;  $\lambda = 0.709300 \text{ \AA}$ ).

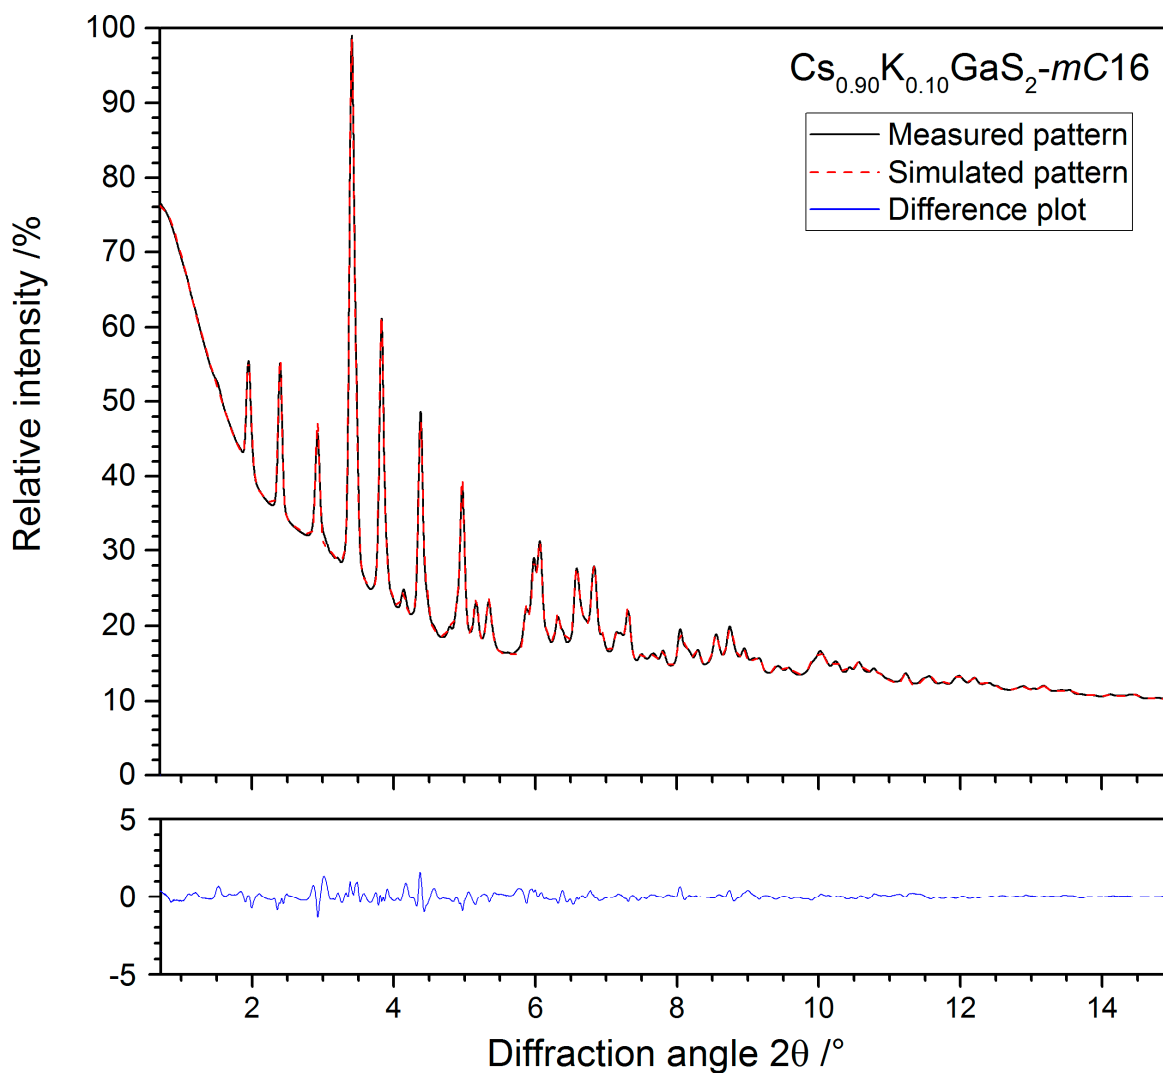

**Figure S6** Rietveld refinement of the X-ray diffraction pattern of  $\text{Cs}_{0.90}\text{K}_{0.10}\text{GaS}_2\text{-}m\text{C16}$  ( $\lambda = 0.20717 \text{ \AA}$ ,  $T = 20 \text{ }^\circ\text{C}$ , 3201 data points) including the difference plot.

**Table S1** Atomic coordinates and isotropic displacement parameters  $U_{\text{iso}}/\text{\AA}^2$  for  $\text{Cs}_{0.90}\text{K}_{0.10}\text{GaS}_2\text{-}m\text{C16}$  (20 °C).

| Atom | <i>s.o.f.</i> | Wyck.      | <i>x</i> | <i>y</i>  | <i>z</i> | $U_{\text{iso}}$ |
|------|---------------|------------|----------|-----------|----------|------------------|
| Cs   | 0.90(1)*      | 4 <i>e</i> | 0        | 0.145(1)* | ¼        | 0.030(3)*        |
| K    | 0.10*         | 4 <i>e</i> | 0        | 0.145(1)* | ¼        | 0.030(3)*        |
| Ga   | 1             | 4 <i>e</i> | 0        | 0.504(1)  | ¼        | 0.025(6)         |
| S    | 1             | 8 <i>f</i> | 0.179(2) | 0.398(1)  | 0.093(2) | 0.030(7)         |

\* The coordinates, occupation factors, and displacement parameters of the Cs and K sites were refined using restraints to give a fully occupied alkali metal position in total. A *s.o.f.* of 1 means a fully occupied site, regardless its multiplicity.

**Table S2** Anisotropic displacement parameters  $U_{ij}/\text{\AA}^2$  for  $\text{Cs}_{0.90}\text{K}_{0.10}\text{GaS}_2\text{-}m\text{C16}$  (20 °C).

| Atom | $U_{11}$ | $U_{22}$ | $U_{33}$ | $U_{12}$ | $U_{13}$ | $U_{23}$ |
|------|----------|----------|----------|----------|----------|----------|
| Cs/K | 0.03(1)  | 0.03(1)  | 0.03(1)  | 0        | 0.01(1)  | 0        |
| Ga   | 0.02(1)  | 0.04(1)  | 0.03(1)  | 0        | 0.02(1)  | 0        |
| S    | 0.04(1)  | 0.04(1)  | 0.01(1)  | 0.02(1)  | 0.01(1)  | 0.00(1)  |

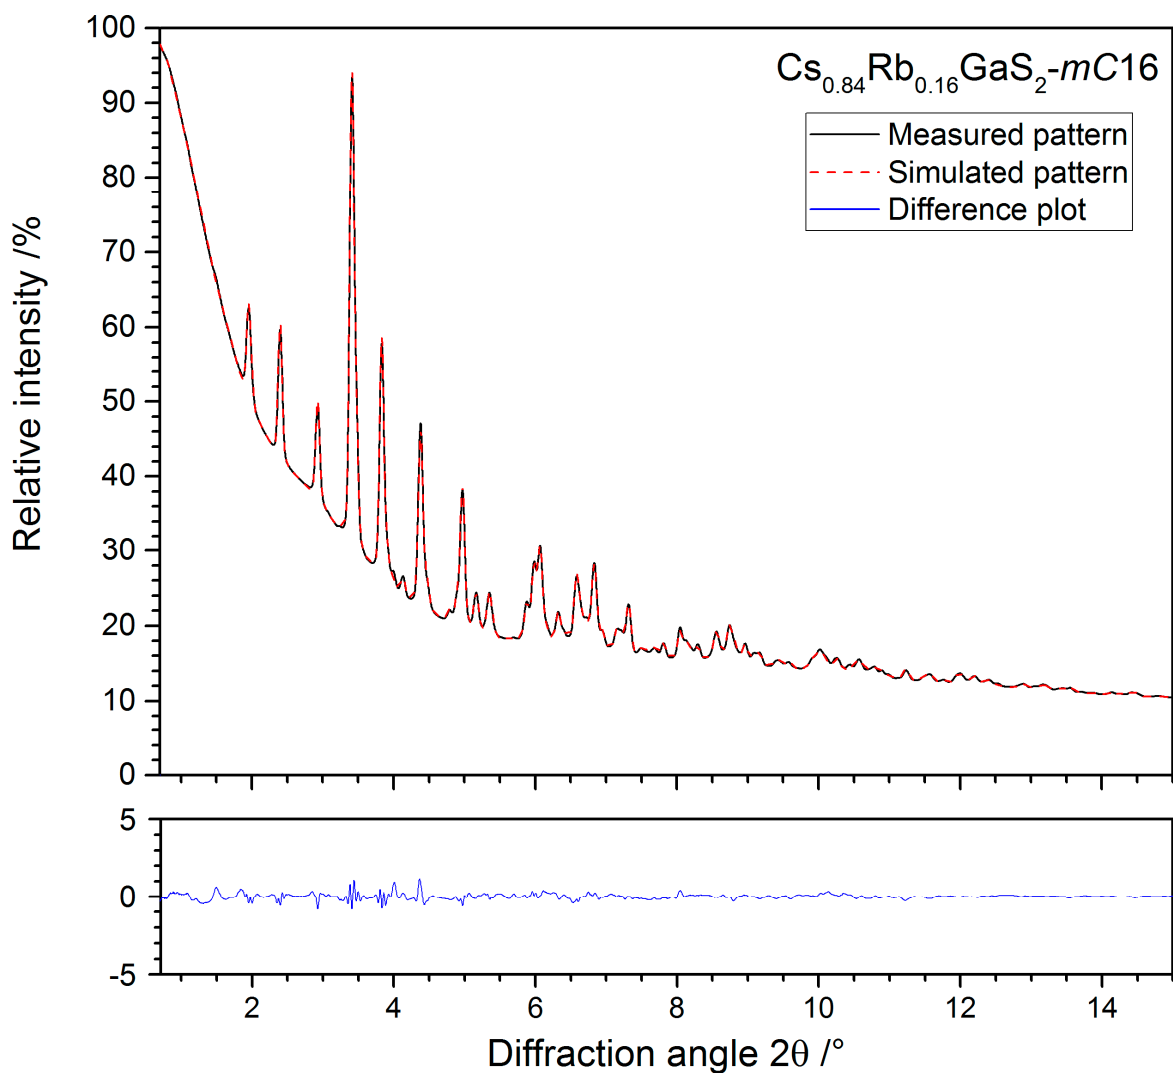

**Figure S7** Rietveld refinement of the X-ray diffraction pattern of  $\text{Cs}_{0.84}\text{Rb}_{0.16}\text{GaS}_2\text{-}m\text{C16}$  ( $\lambda = 0.20717 \text{ \AA}$ ,  $T = 20 \text{ }^\circ\text{C}$ , 3201 data points) including the difference plot.

**Table S3** Atomic coordinates and isotropic displacement parameters  $U_{\text{iso}}/\text{\AA}^2$  for  $\text{Cs}_{0.84}\text{Rb}_{0.16}\text{GaS}_2\text{-}m\text{C16}$  (20 °C).

| Atom | <i>s.o.f.</i> | Wyck.      | <i>x</i> | <i>y</i>  | <i>z</i> | $U_{\text{iso}}$ |
|------|---------------|------------|----------|-----------|----------|------------------|
| Cs   | 0.84(1)*      | 4 <i>e</i> | 0        | 0.145(1)* | ¼        | 0.032(2)*        |
| Rb   | 0.16*         | 4 <i>e</i> | 0        | 0.145(1)* | ¼        | 0.032(2)*        |
| Ga   | 1             | 4 <i>e</i> | 0        | 0.503(1)  | ¼        | 0.016(4)         |
| S    | 1             | 8 <i>f</i> | 0.182(1) | 0.399(1)  | 0.094(1) | 0.027(5)         |

\* The coordinates, occupation factors, and displacement parameters of the Cs and K sites were refined using restraints to give a fully occupied alkali metal position in total. A *s.o.f.* of 1 means a fully occupied site, regardless its multiplicity.

**Table S4** Anisotropic displacement parameters  $U_{ij}/\text{\AA}^2$  for  $\text{Cs}_{0.84}\text{Rb}_{0.16}\text{GaS}_2\text{-}m\text{C16}$  (20 °C).

| Atom  | $U_{11}$ | $U_{22}$ | $U_{33}$ | $U_{12}$ | $U_{13}$ | $U_{23}$ |
|-------|----------|----------|----------|----------|----------|----------|
| Cs/Rb | 0.04(1)  | 0.03(1)  | 0.03(1)  | 0        | 0.02(1)  | 0        |
| Ga    | 0.02(1)  | 0.02(1)  | 0.01(1)  | 0        | 0.02(1)  | 0        |
| S     | 0.04(1)  | 0.02(1)  | 0.01(1)  | 0.01(1)  | 0.00(1)  | 0.01(1)  |

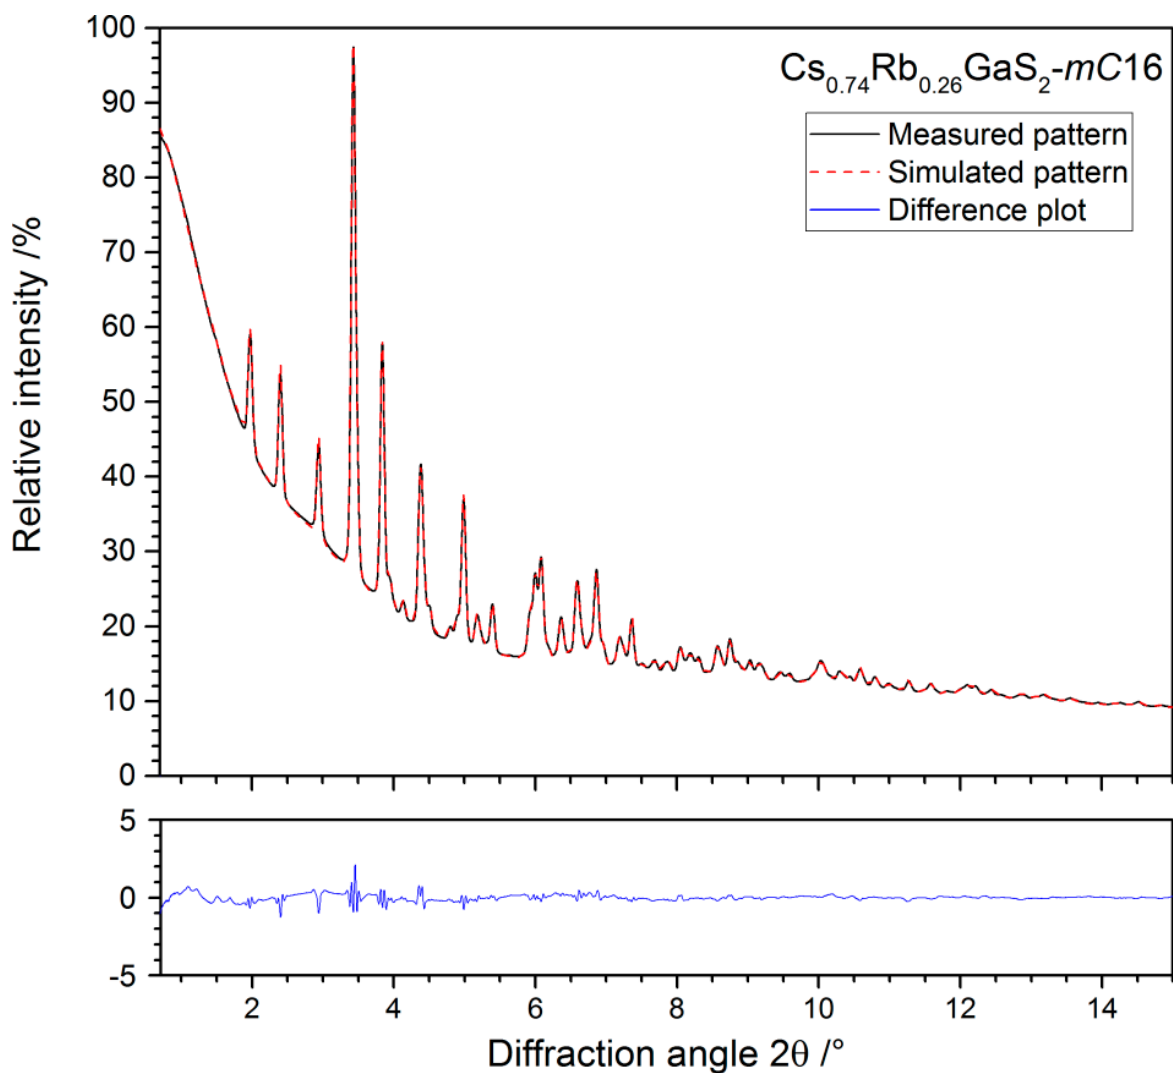

**Figure S8** Rietveld refinement of the X-ray diffraction pattern of  $\text{Cs}_{0.74}\text{Rb}_{0.26}\text{GaS}_2\text{-}m\text{C16}$  ( $\lambda = 0.20717 \text{ \AA}$ ,  $T = 20 \text{ }^\circ\text{C}$ , 3201 data points) including the difference plot.

**Table S5** Atomic coordinates and isotropic displacement parameters  $U_{\text{iso}}/\text{\AA}^2$  for  $\text{Cs}_{0.74}\text{Rb}_{0.26}\text{GaS}_2\text{-}m\text{C16}$  (20 °C).

| Atom | <i>s.o.f.</i> | Wyck.      | <i>x</i> | <i>y</i>  | <i>z</i> | $U_{\text{iso}}$ |
|------|---------------|------------|----------|-----------|----------|------------------|
| Cs   | 0.76(1)*      | 4 <i>e</i> | 0        | 0.145(1)* | ¼        | 0.035(3)*        |
| Rb   | 0.24*         | 4 <i>e</i> | 0        | 0.145(1)* | ¼        | 0.035(3)*        |
| Ga   | 1             | 4 <i>e</i> | 0        | 0.504(1)  | ¼        | 0.017(6)         |
| S    | 1             | 8 <i>f</i> | 0.181(1) | 0.398(1)  | 0.095(2) | 0.024(7)         |

\* The coordinates, occupation factors, and displacement parameters of the Cs and K sites were refined using restraints to give a fully occupied alkali metal position in total. A *s.o.f.* of 1 means a fully occupied site, regardless its multiplicity.

**Table S6** Anisotropic displacement parameters  $U_{ij}/\text{\AA}^2$  for  $\text{Cs}_{0.74}\text{Rb}_{0.26}\text{GaS}_2\text{-}m\text{C16}$  (20 °C).

| Atom  | $U_{11}$ | $U_{22}$ | $U_{33}$ | $U_{12}$ | $U_{13}$ | $U_{23}$ |
|-------|----------|----------|----------|----------|----------|----------|
| Cs/Rb | 0.03(1)  | 0.04(1)  | 0.04(1)  | 0        | 0.02(1)  | 0        |
| Ga    | 0.02(1)  | 0.02(1)  | 0.03(1)  | 0        | 0.02(1)  | 0        |
| S     | 0.03(1)  | 0.02(1)  | 0.01(1)  | 0.01(1)  | 0.02(1)  | 0.00(1)  |

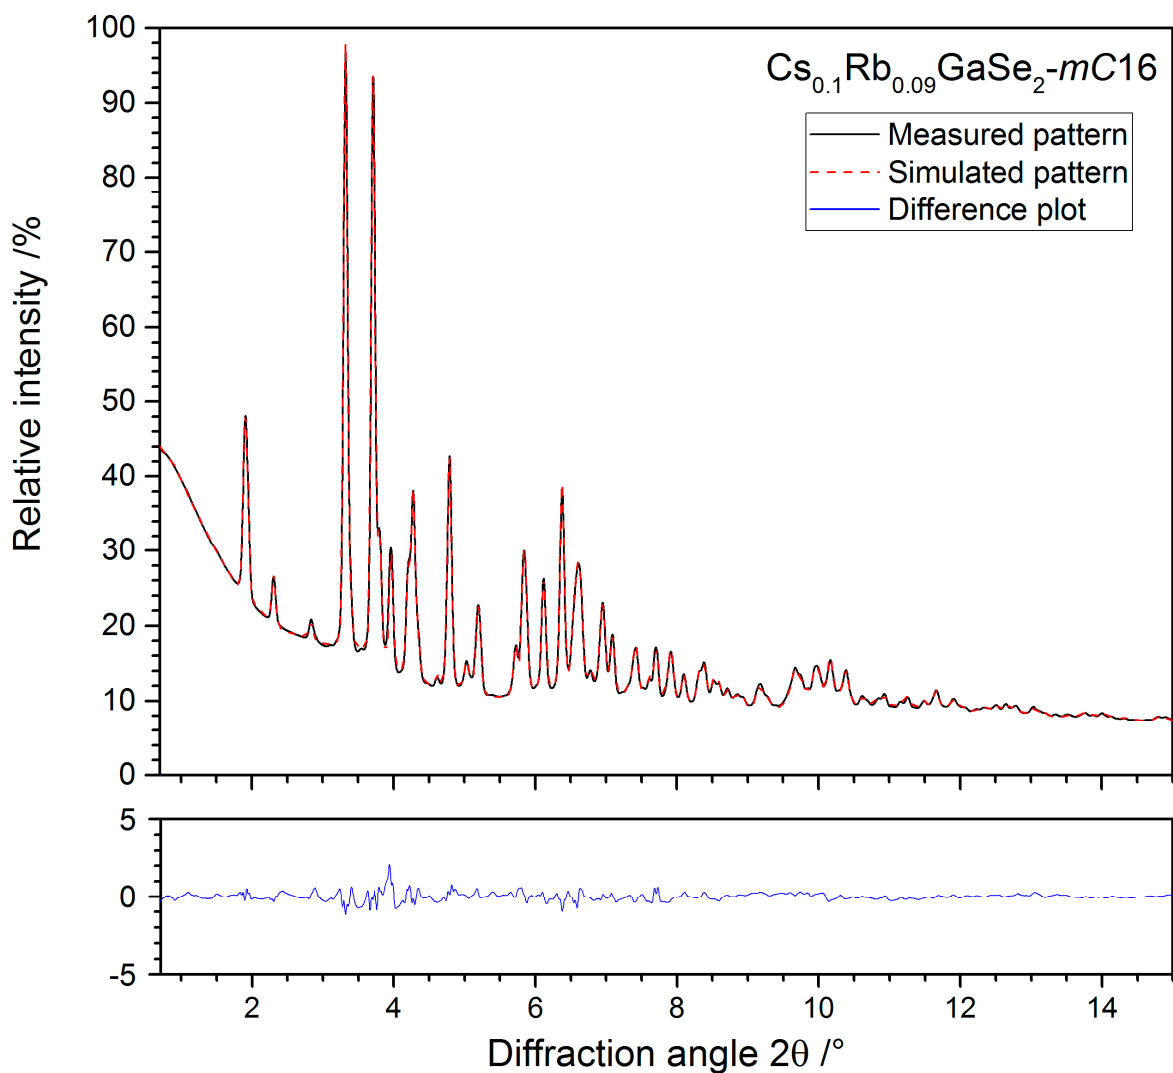

**Figure S8** Rietveld refinement of the X-ray diffraction pattern of  $\text{Cs}_{0.1}\text{Rb}_{0.09}\text{GaSe}_2\text{-}m\text{C16}$  ( $\lambda = 0.20717 \text{ \AA}$ ,  $T = 20 \text{ }^\circ\text{C}$ , 3201 data points) including the difference plot.

**Table S7** Atomic coordinates and isotropic displacement parameters  $U_{\text{iso}}/\text{\AA}^2$  for  $\text{Cs}_{0.91}\text{Rb}_{0.09}\text{GaS}_2\text{-}m\text{C16}$  (20 °C).

| Atom | <i>s.o.f.</i> | Wyck.      | <i>x</i> | <i>y</i>  | <i>z</i> | $U_{\text{iso}}$ |
|------|---------------|------------|----------|-----------|----------|------------------|
| Cs   | 0.91(1)*      | 4 <i>e</i> | 0        | 0.141(1)* | ¼        | 0.036(5)*        |
| Rb   | 0.09*         | 4 <i>e</i> | 0        | 0.141(1)* | ¼        | 0.036(5)*        |
| Ga   | 1             | 4 <i>e</i> | 0        | 0.503(1)  | ¼        | 0.025(14)        |
| Se   | 1             | 8 <i>f</i> | 0.186(1) | 0.394(1)  | 0.097(1) | 0.032(4)         |

\* The coordinates, occupation factors, and displacement parameters of the Cs and K sites were refined using restraints to give a fully occupied alkali metal position in total. A *s.o.f.* of 1 means a fully occupied site, regardless its multiplicity.

**Table S8** Anisotropic displacement parameters  $U_{ij}/\text{\AA}^2$  for  $\text{Cs}_{0.91}\text{Rb}_{0.09}\text{GaS}_2\text{-}m\text{C16}$  (20 °C).

| Atom  | $U_{11}$ | $U_{22}$ | $U_{33}$ | $U_{12}$ | $U_{13}$ | $U_{23}$ |
|-------|----------|----------|----------|----------|----------|----------|
| Cs/Rb | 0.04(1)  | 0.04(1)  | 0.04(1)  | 0        | 0.04(1)  | 0        |
| Ga    | 0.03(1)  | 0.03(1)  | 0.03(2)  | 0        | 0.02(3)  | 0        |
| Se    | 0.05(1)  | 0.03(1)  | 0.02(1)  | 0.02(1)  | 0.02(1)  | 0.01(1)  |

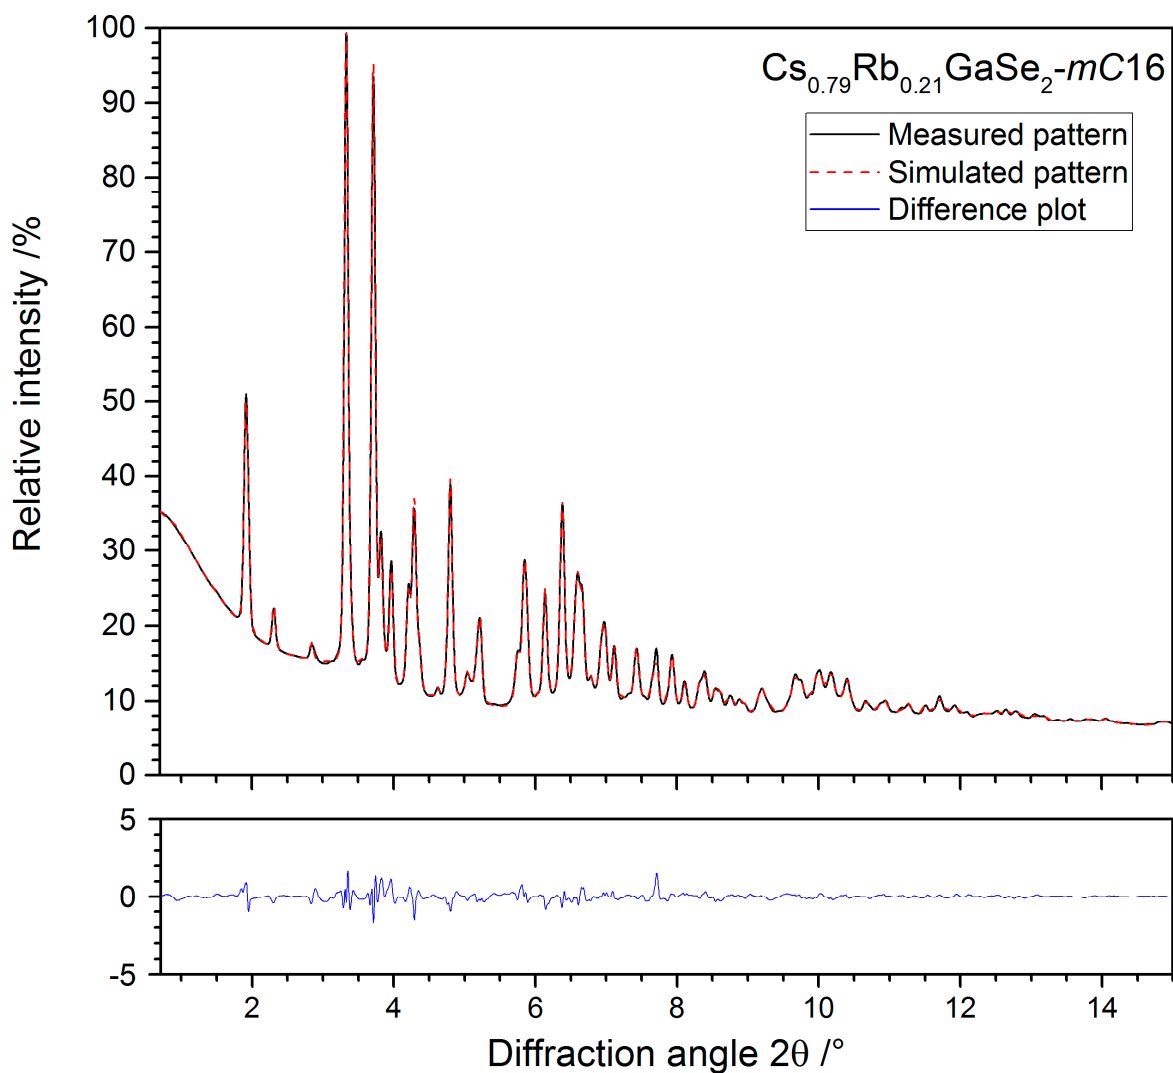

**Figure S10** Rietveld refinement of the X-ray diffraction pattern of  $\text{Cs}_{0.79}\text{Rb}_{0.21}\text{GaSe}_2\text{-}m\text{C16}$  ( $\lambda = 0.20717 \text{ \AA}$ ,  $T = 20 \text{ }^\circ\text{C}$ , 3201 data points) including the difference plot.

**Table S9** Atomic coordinates and isotropic displacement parameters  $U_{\text{iso}}/\text{\AA}^2$  for  $\text{Cs}_{0.79}\text{Rb}_{0.21}\text{GaSe}_2\text{-}m\text{C16}$  (20 °C).

| Atom | <i>s.o.f.</i> | Wyck.      | <i>x</i> | <i>y</i>  | <i>z</i> | $U_{\text{iso}}$ |
|------|---------------|------------|----------|-----------|----------|------------------|
| Cs   | 0.79(1)*      | 4 <i>e</i> | 0        | 0.141(1)* | ¼        | 0.034(3)*        |
| Rb   | 0.21*         | 4 <i>e</i> | 0        | 0.141(1)* | ¼        | 0.034(3)*        |
| Ga   | 1             | 4 <i>e</i> | 0        | 0.504(1)  | ¼        | 0.023(6)         |
| Se   | 1             | 8 <i>f</i> | 0.185(1) | 0.394(1)  | 0.098(1) | 0.030(3)         |

\* The coordinates, occupation factors, and displacement parameters of the Cs and K sites were refined using restraints to give a fully occupied alkali metal position in total. A *s.o.f.* of 1 means a fully occupied site, regardless its multiplicity.

**Table S10** Anisotropic displacement parameters  $U_{ij}/\text{\AA}^2$  for  $\text{Cs}_{0.79}\text{Rb}_{0.21}\text{GaSe}_2\text{-}m\text{C16}$  (20 °C).

| Atom  | $U_{11}$ | $U_{22}$ | $U_{33}$ | $U_{12}$ | $U_{13}$ | $U_{23}$ |
|-------|----------|----------|----------|----------|----------|----------|
| Cs/Rb | 0.04(1)  | 0.03(1)  | 0.03(1)  | 0        | 0.01(1)  | 0        |
| Ga    | 0.02(1)  | 0.03(1)  | 0.03(1)  | 0        | 0.01(1)  | 0        |
| Se    | 0.04(1)  | 0.03(1)  | 0.03(1)  | 0.01(1)  | 0.03(1)  | 0.01(1)  |
